# Supplementary material for: In Vivo Dual-Modality Fluorescence and Magnetic Resonance Imaging-Guided Lymph Node Mapping with Good Biocompatibility Manganese Oxide Nanoparticles
Source: PubMed Central journal article supplement (PMC6149721; doi:10.3390/molecules22122208), 2017-12-12
Supplement: molecules-22-02208-s001.pdf [file molecules-22-02208-s001.pdf]

## Supporting Information

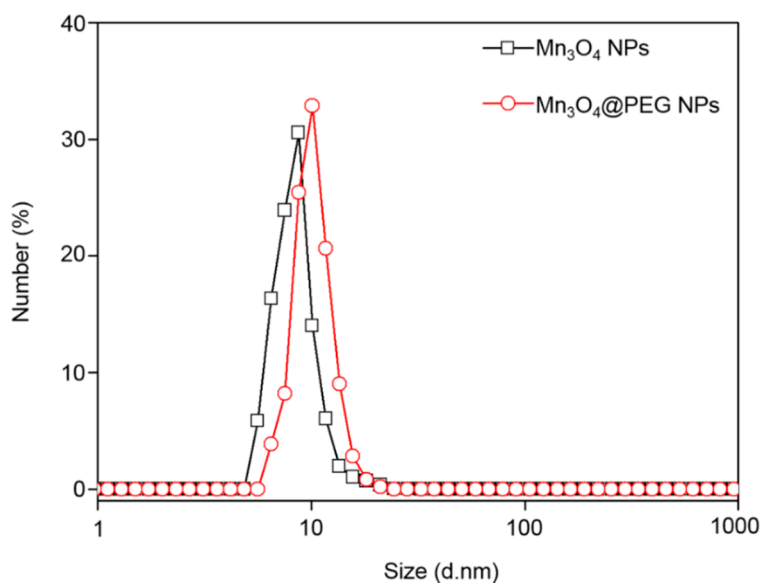

**Figure S1.** Size analysis of Mn<sub>3</sub>O<sub>4</sub> and Mn<sub>3</sub>O<sub>4</sub>@PEG NPs by dynamic light scattering (DLS).

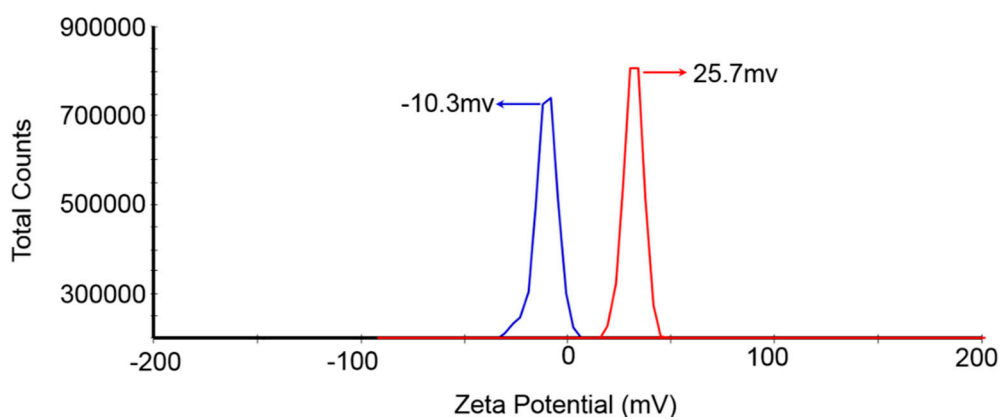

**Figure S2.** Zeta potential analysis of Mn<sub>3</sub>O<sub>4</sub>@PEG NPs and Mn<sub>3</sub>O<sub>4</sub>@PEG-Cy<sub>7.5</sub> NPs by Malvern Zetasizer Nano ZS.

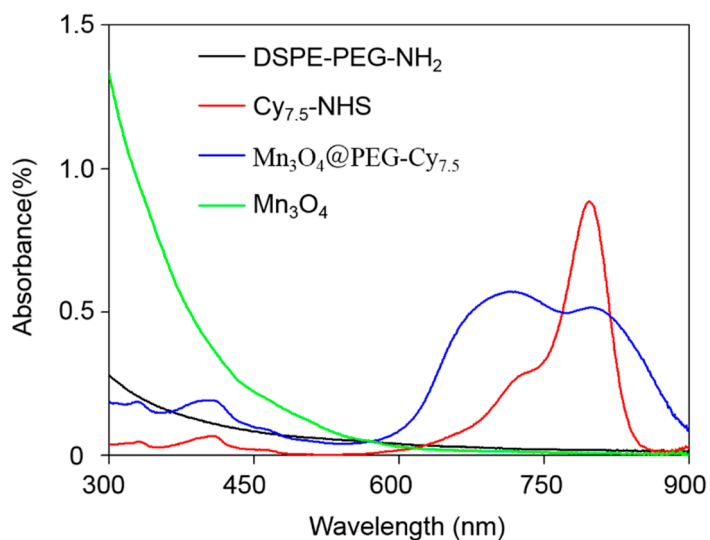

**Figure S3.** Absorbance spectra of Cy<sub>7.5</sub>-NHS, Mn<sub>3</sub>O<sub>4</sub>, Mn<sub>3</sub>O<sub>4</sub>@PEG-Cy<sub>7.5</sub>, and DSPE-PEG-NH<sub>2</sub> as determined by UV spectrophotometer. NHS = N-Hydroxysuccinimide; DSPE = 1,2-Distearoyl-sn-glycero-3-phosphoethanolamine.

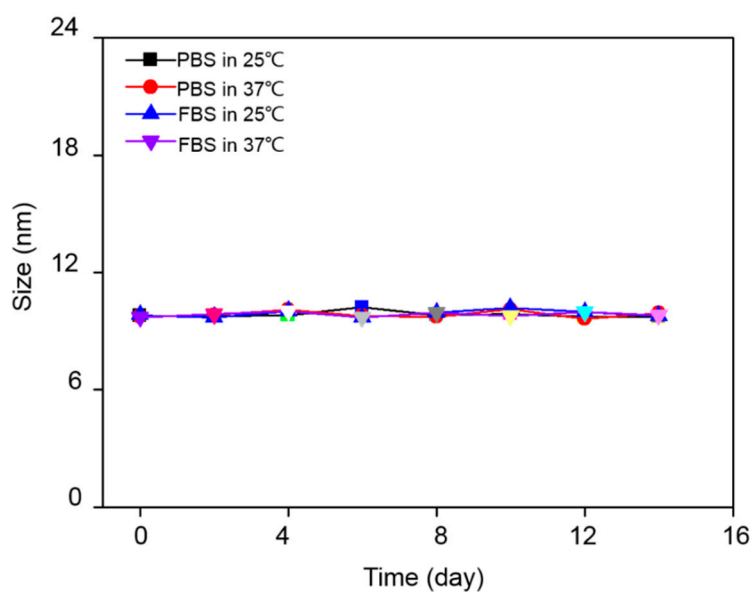

**Figure S4.** The size stability of Mn<sub>3</sub>O<sub>4</sub>@PEG-Cy<sub>7.5</sub> NPs in PBS and 10% fetal bovine serum (FBS) varies with time and different temperatures in two weeks.

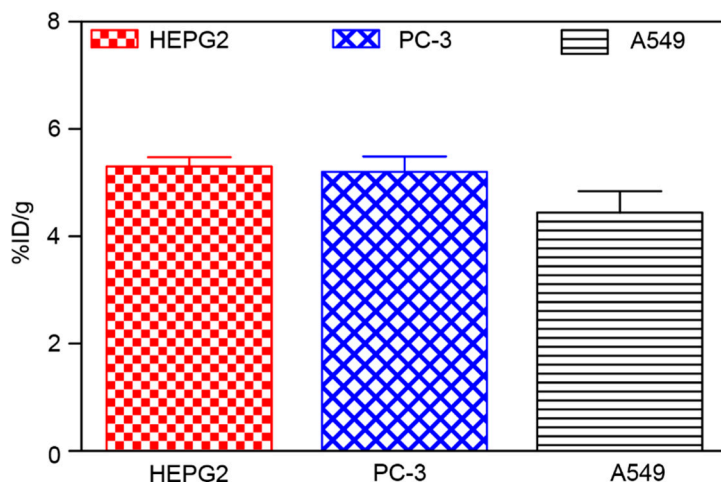

**Figure S5.** Quantitative analysis of cell uptake based on the detection of the content of Mn at 48 h by Inductively Coupled Plasma-Atomic Emission Spectrometry (ICP-AES) (n = 3).

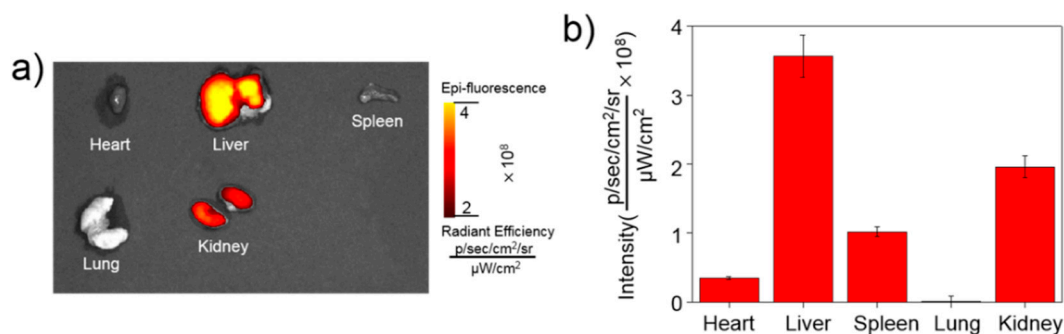

**Figure S6.** Ex vivo imaging of Mn<sub>3</sub>O<sub>4</sub>@PEG-Cy<sub>7.5</sub> NPs at 48 h following intravenous injection of Mn<sub>3</sub>O<sub>4</sub>@PEG-Cy<sub>7.5</sub> NPs (n = 3 per group). (a) Ex vivo FI images of main organs. (b) Quantitative analysis of the FI images of the main organs (n = 3 per group).

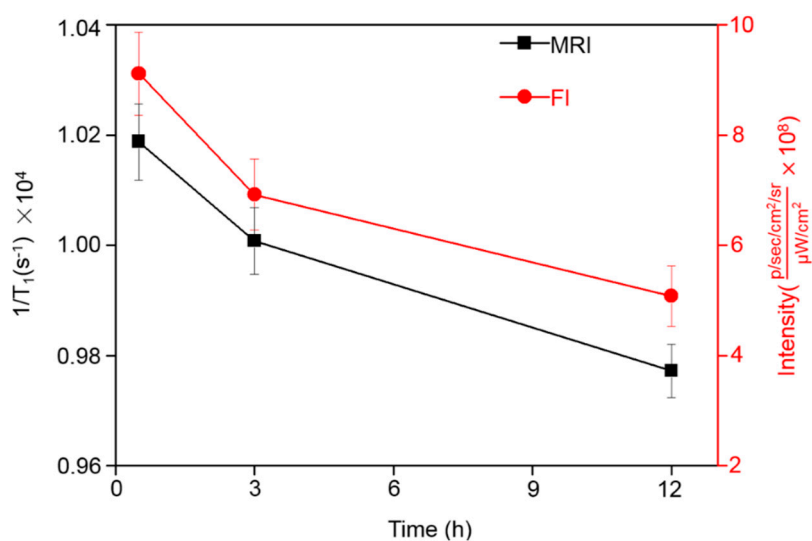

**Figure S7.** Quantitative analysis of the FI and MRI biodistribution pattern data in vivo. Time-activity curves of the liver following intravenous injection of Mn<sub>3</sub>O<sub>4</sub>@PEG-Cy<sub>7.5</sub> NPs at 0.5 h, 3 h, and 12 h (n = 3 per group).

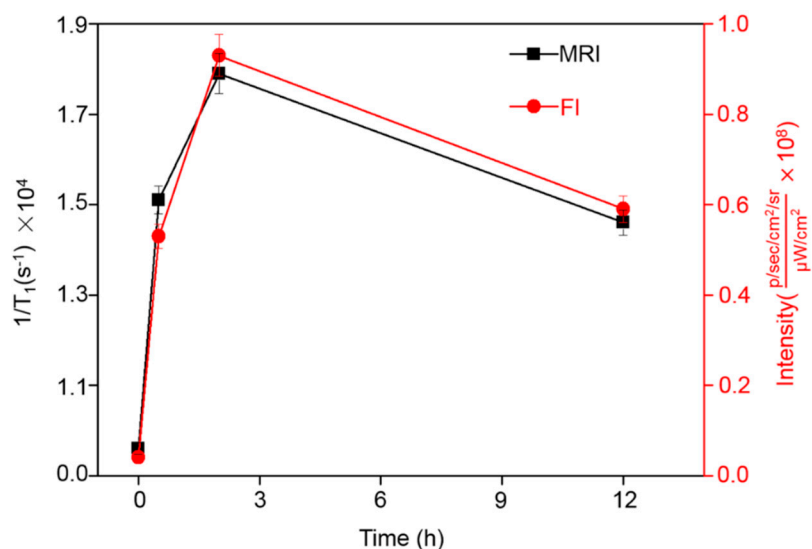

**Figure S8.** Quantitative analysis of the FI and MRI data in lymph nodes. Time-activity curves of the lymph node following subcutaneous intravenous injection of  $Mn_3O_4@PEG-Cy7.5$  NPs at 0.5 h, 2 h, and 12 h (n = 3 per group).

**Table S1** Serum level of liver and kidney function markers in mice 2 weeks after injection of  $Mn_3O_4@PEG-Cy7.5$  NPs (20 mg/kg). n = 3. AST = aspartate aminotransferase; ALT = alanine aminotransferase; ALP = alkaline phosphatase; TBIL = total bilirubin (TBIL); CREA = serum creatinine; UREA = serum urea.

| Sample  | ALT (U/L)        | AST (U/L)         | ALP (U/L)         | ADA (U/L)      | UREA(mmol/L)     | CREA( $\mu$ mol/L) |
|---------|------------------|-------------------|-------------------|----------------|------------------|--------------------|
| Control | 53.49 $\pm$ 2.56 | 133.45 $\pm$ 4.38 | 110.37 $\pm$ 3.15 | 5.6 $\pm$ 0.43 | 13.32 $\pm$ 0.19 | 2.4 $\pm$ 0.04     |
| NPs     | 51.27 $\pm$ 2.38 | 131.37 $\pm$ 3.19 | 113.29 $\pm$ 4.11 | 5.9 $\pm$ 0.39 | 13.45 $\pm$ 0.17 | 2.1 $\pm$ 0.03     |
